# Supplementary material for: Chemical short-range order in derivative Cr–Ta–Ti–V–W high entropy alloys from the first-principles thermodynamic study
Source: Royal Society of Chemistry journal article supplement (doi:10.1039/d0cp03764h), 2020-01-01
Supplement: d0cp03764h1.pdf [file d0cp03764h1.pdf]

# Electronic Supplementary Information

## Chemical short-range order in Cr-Ta-Ti-V-W high entropy alloys and their derivatives from the first-principles thermodynamic study

Damian Sobieraj,<sup>ab</sup> Jan S. Wróbel,<sup>a</sup> Tomasz Rygier,<sup>a</sup> Krzysztof J. Kurzydłowski,<sup>c</sup> Osman El-Atwani,<sup>d</sup> Arun Devaraj,<sup>e</sup> Enrique Martinez Saez,<sup>d</sup> and Duc Nguyen-Manh<sup>b</sup>

<sup>a</sup> Faculty of Materials Science and Engineering, Warsaw University of Technology, ul. Wołoska 141, 02-507 Warsaw, Poland

<sup>b</sup> CCFE, United Kingdom Atomic Energy Authority, Abingdon OX14 3DB, UK

<sup>c</sup> Faculty of Mechanical Engineering, Białystok University of Technology, ul. Wiejska 45C, 15-351 Białystok, Poland

<sup>d</sup> Los Alamos National Laboratory, Los Alamos, NM 87545, USA

<sup>e</sup> Physical and Computational Sciences Directorate, Pacific Northwest National Laboratory, 902 Battelle Blvd, Richland, WA 99354, USA

<sup>f</sup> Department of Materials, University of Oxford, Oxford OX1 3PH, UK

Table S1 Structures with the lowest enthalpies of mixing in 10 different ternary subsystems in Cr-Ta-Ti-V-W system within present database. Structures marked as ground states by ATAT package, predicted by CE, are described with superscript "GS". The values of the enthalpy of mixing are given in eV/atom

| Structure                                       | Symmetry Group                 | DFT    | CE     |
|-------------------------------------------------|--------------------------------|--------|--------|
| Cr <sub>2</sub> TaTi                            | <i>Imm2</i>                    | -0.020 | -0.024 |
| Cr <sub>2</sub> TaV                             | <i>P4/mmm</i>                  | -0.025 | -0.028 |
| CrTa <sub>2</sub> W                             | <i>P4/mmm</i>                  | -0.048 | -0.047 |
| Cr <sub>2</sub> TiW                             | <i>Fm<math>\bar{3}</math>m</i> | -0.057 | -0.047 |
| Cr <sub>2</sub> VW                              | <i>Fm<math>\bar{3}</math>m</i> | -0.063 | -0.064 |
| CrTi <sub>2</sub> V                             | <i>Imm2</i>                    | -0.054 | -0.027 |
| TaTiV <sub>2</sub>                              | <i>Imm2</i>                    | 0.012  | 0.018  |
| TaVW <sub>2</sub>                               | <i>Imm2</i>                    | -0.065 | -0.061 |
| TaTi <sub>2</sub> W <sub>2</sub> <sup>GS</sup>  | <i>R<math>\bar{3}</math>m</i>  | -0.091 | -0.093 |
| Ta <sub>2</sub> Ti <sub>2</sub> W <sup>GS</sup> | <i>R<math>\bar{3}</math>m</i>  | -0.058 | -0.043 |
| TaTi <sub>2</sub> W <sup>GS</sup>               | <i>Immm</i>                    | -0.069 | -0.053 |
| TiVW <sub>2</sub>                               | <i>Immm</i>                    | -0.064 | -0.070 |

Table S2 Structures with low enthalpy of mixing in each quaternary sub-system. Enthalpy of mixing values are given in eV/atom

| Structure                                        | Symmetry Group                | DFT    | CE     |
|--------------------------------------------------|-------------------------------|--------|--------|
| CrTa <sub>2</sub> Ti <sub>2</sub> W <sub>2</sub> | <i>R<math>\bar{3}</math>m</i> | -0.061 | -0.062 |
| CrTa <sub>2</sub> V <sub>2</sub> W <sub>2</sub>  | <i>R<math>\bar{3}</math>m</i> | -0.045 | -0.046 |
| Cr <sub>2</sub> TiV <sub>2</sub> W <sub>2</sub>  | <i>R<math>\bar{3}</math>m</i> | -0.067 | -0.066 |
| Ta <sub>2</sub> Ti <sub>2</sub> VW <sub>2</sub>  | <i>R<math>\bar{3}</math>m</i> | -0.053 | -0.059 |
| Cr <sub>2</sub> TaTi <sub>2</sub> V <sub>2</sub> | <i>R<math>\bar{3}</math>m</i> | -0.037 | -0.022 |

Table S3 Structures with low enthalpy of mixing for each quinary composition in our DFT database. Enthalpy of mixing values are given in eV/atom

| Structure              | Symmetry Group                | DFT    | CE     |
|------------------------|-------------------------------|--------|--------|
| CrTaTi <sub>2</sub> VW | <i>P3m1</i>                   | 0.031  | 0.032  |
| CrTaTiVW               | <i>R<math>\bar{3}</math>m</i> | -0.038 | -0.044 |
| CrTaTiV <sub>2</sub> W | <i>Amm2</i>                   | 0.029  | 0.022  |

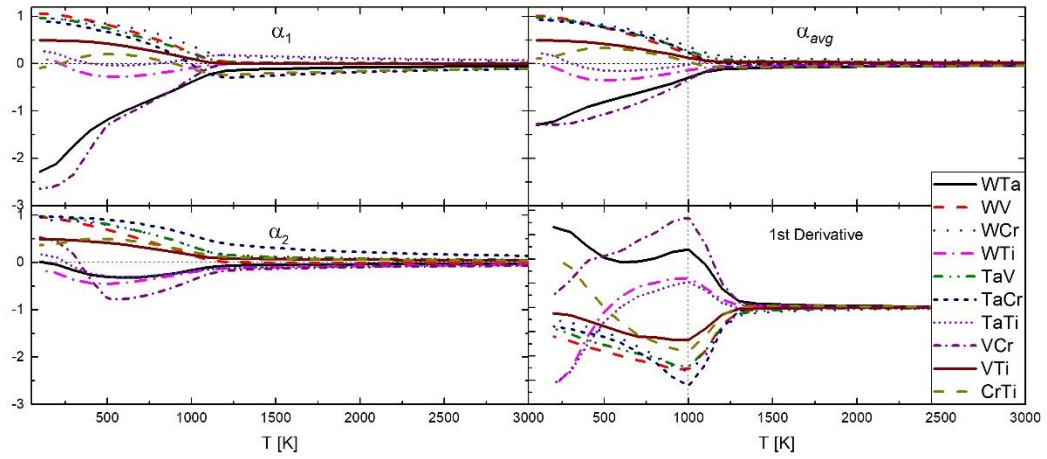

Fig. S1 Short-range order parameter for 1st and 2nd shell (left), as well as the average SRO with its derivative (right) for equiatomic quinary Cr-Ta-Ti-V-W alloy. Order-disorder transition temperature has been marked with vertical dashed line

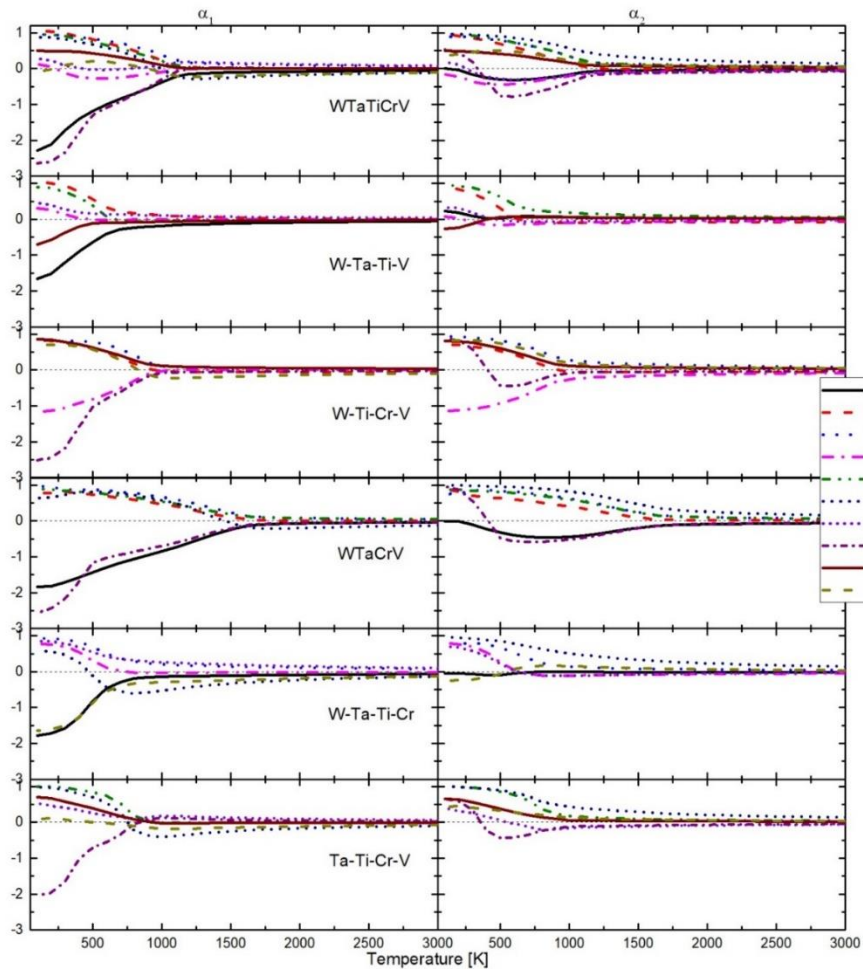

Fig. S2 Short-range order parameters for 1st (left) and 2nd (right) nearest neighbours in quaternary and quinary equiatomic alloys

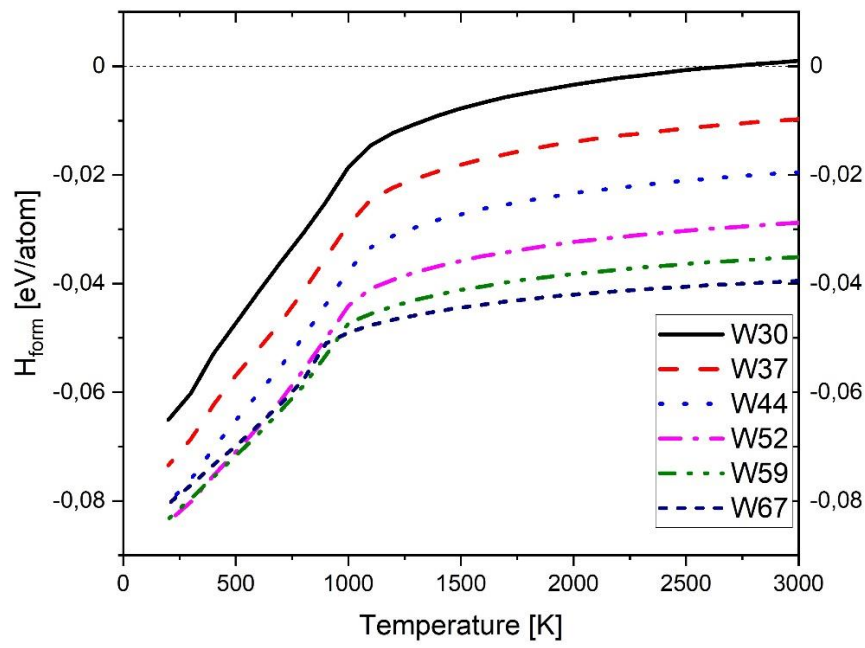

Fig. S3 Enthalpy of formation dependence on temperature for  $W_x(\text{CrTaTiV})_{1-x}$  alloys. W30, W37, W44, W52, W57 and W67 denote  $W_x(\text{CrTaTiV})_{1-x}$  alloys with W concentration equal to 30%, 37%, 44%, 52%, 57% and 67%, respectively

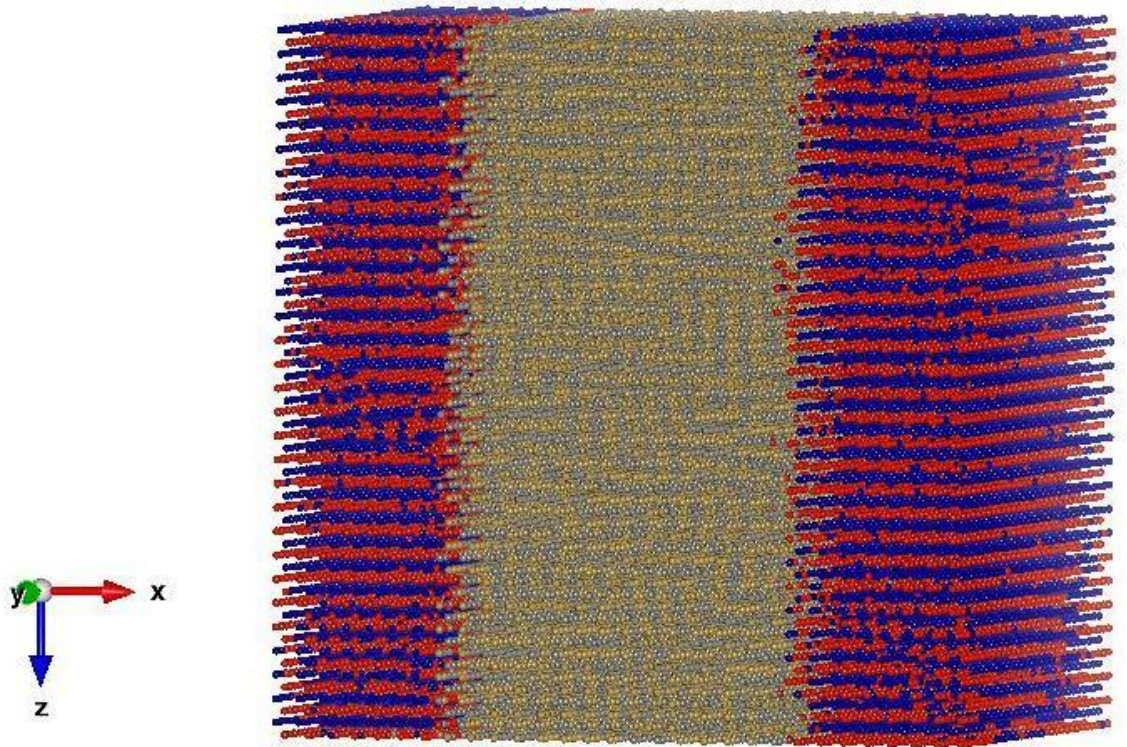

Fig. S4 30x30x30 equiatomic Cr-Ta-V-W structure at 300 K

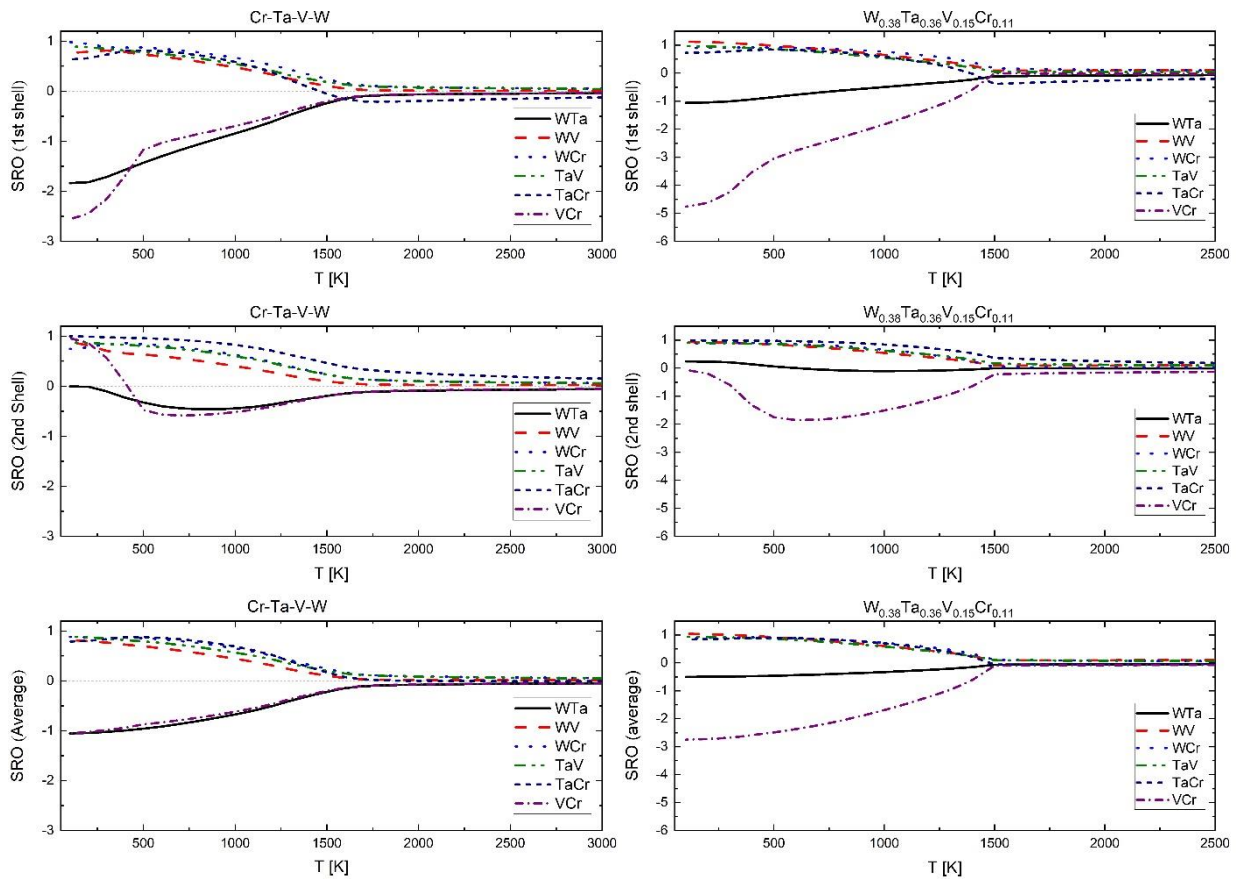

Fig. S5 The short-range order parameter as a function of temperature for 1st and 2nd shell, as well as the average SRO for equiatomic Cr-Ta-V-W (left) alloy in comparison with quaternary  $W_{0.38}Ta_{0.36}Cr_{0.15}V_{0.11}$  alloy (right)
